# Supplementary material for: The Controlled Synthesis of Carbon Tubes and Rods by Template-Assisted Twin Polymerization
Source: Hindawi journal article supplement (doi:10.1155/2013/872019), 2013-01-01
Supplement: f1 [file 872019.f1.pdf]

## **Supplementary information**

### **The controlled synthesis of carbon tubes and rods by template-assisted twin polymerization**

Falko Böttger-Hiller, Patrick Kempe, Gisela Baumann, Michael Hietschold, Philipp Schäfer, Dietrich R. T. Zahn, Albrecht Petzold, Thomas Thurn-Albrecht, Stefan Spange

#### **Index**

|             |                                                                        |      |
|-------------|------------------------------------------------------------------------|------|
| Figure SI 1 | Raman-spectra of synthesized carbon. ....                              | SI 1 |
| Figure SI 2 | Representative XRPD of synthesized carbon. ....                        | SI 1 |
| Figure SI 3 | Photographs and SEM images of glass fibre and coated glass fibre ..... | SI 1 |
| Figure SI 4 | EDX analysis of pure glass fibre. ....                                 | SI 2 |
| Figure SI 5 | SEM images of carbon tubes synthesized by TP on glass fibre. ....      | SI 2 |

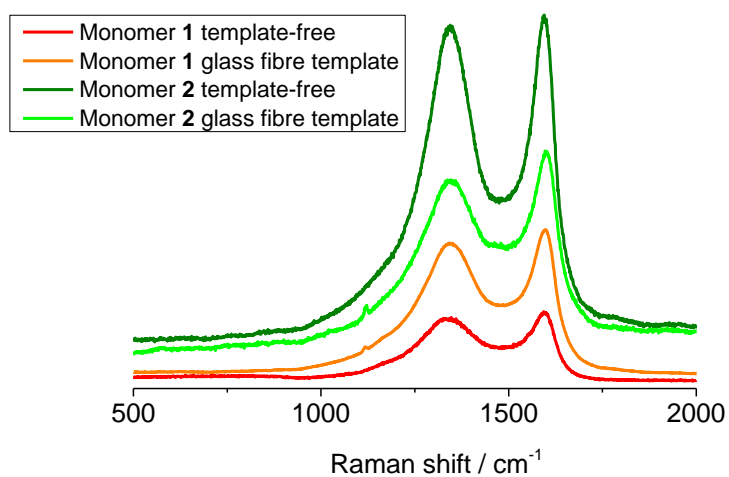

**Figure SI 1.** Raman-spectra of synthesized carbon.

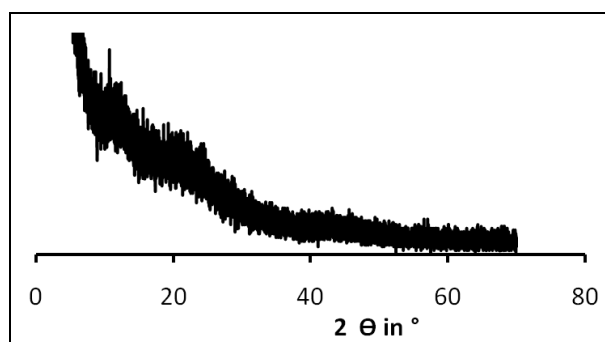

**Figure SI 2.** Representative XRPD of synthesized carbon.

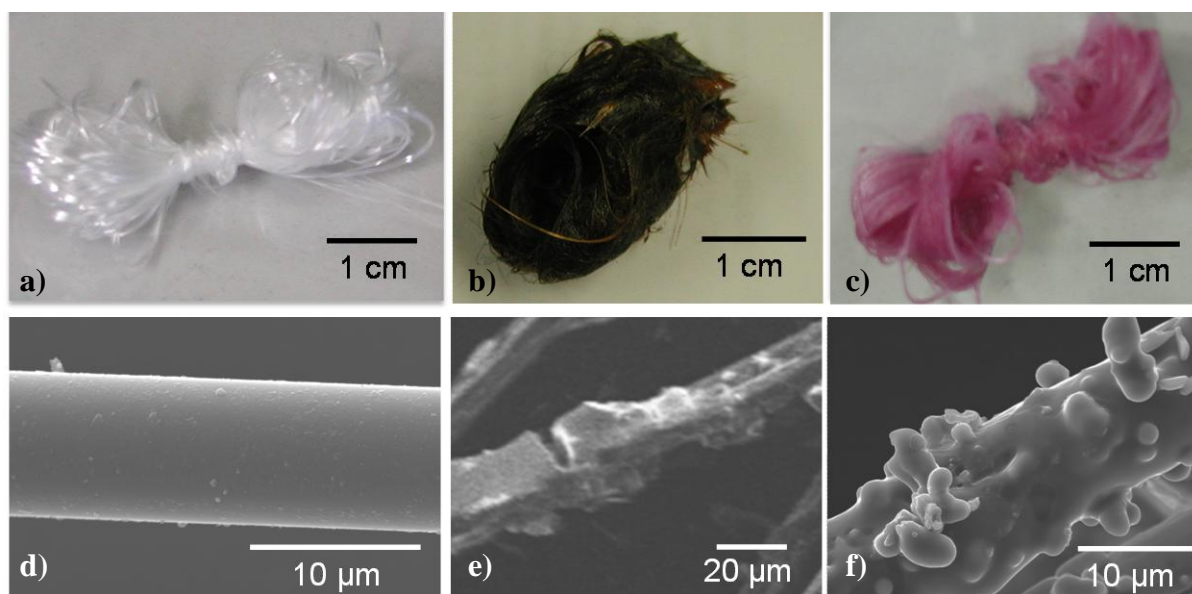

**Figure SI 3.** Photographs (a–c) and SEM images (d–f) of glass fibre (a, d) and coated glass fibre by thermal induction (b, e) and acidic catalysis (c, f).

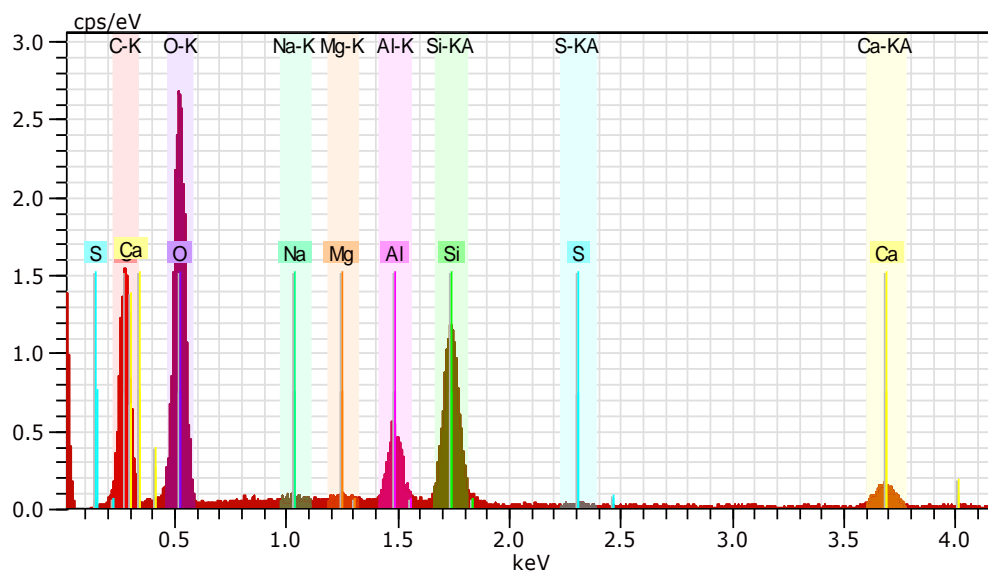

**Figure SI 4.** EDX analysis of pure glass fibre.

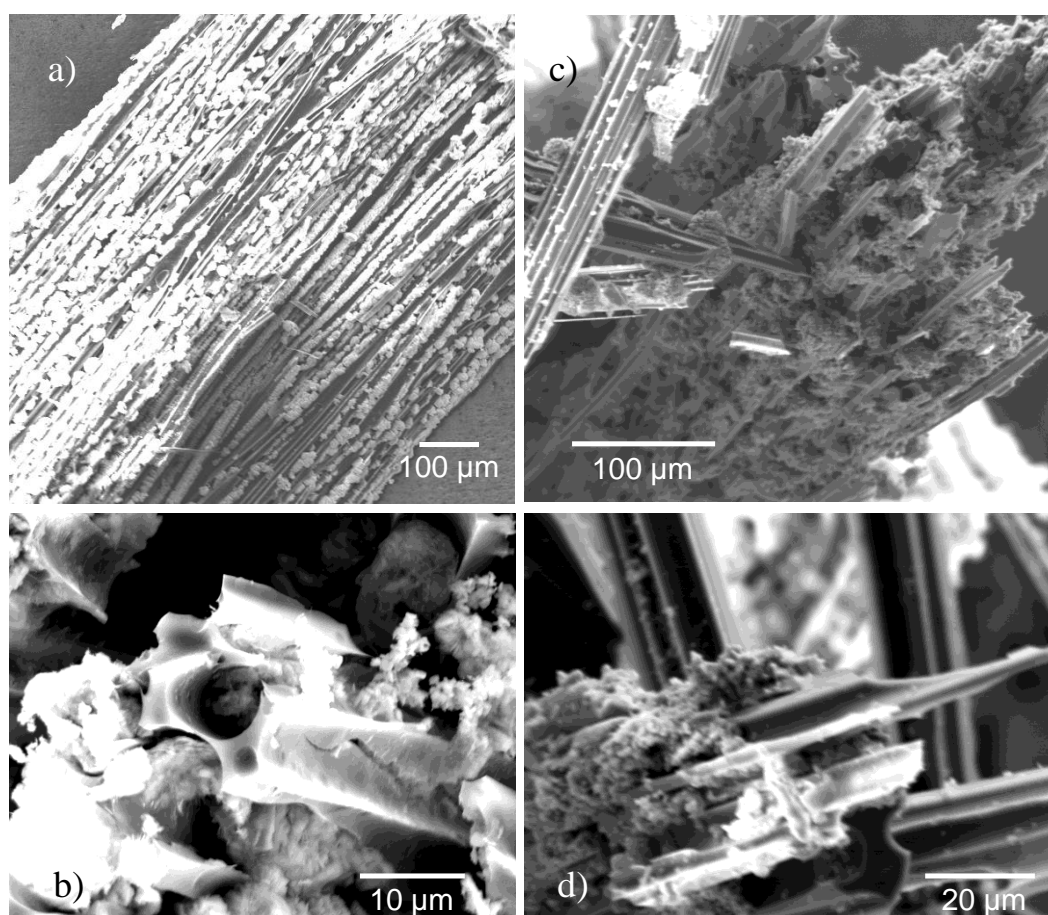

**Figure SI 5.** SEM images of carbon tubes synthesized by TP of 1 (a, b) and 2 (c, d) on glass fibre.
